# Supplementary material
Source: PubMed Central journal article supplement (PMC2704489)
Supplement: NIHMS112814-supplement-Supplemental.pdf [file NIHMS112814-supplement-Supplemental.pdf]

**Figure: S1**

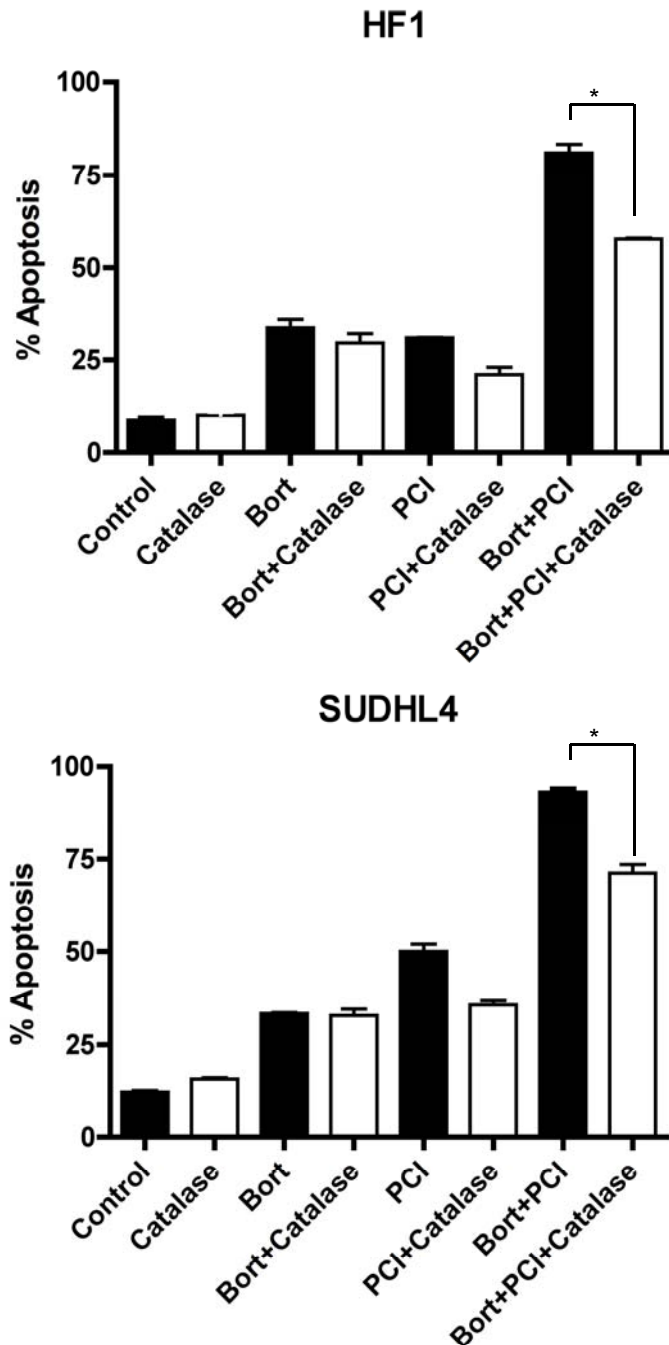

**Fig.S1:** Catalase partially inhibited bortezomib and PCI-24781-induced apoptosis in HF1 and SUDHL4 cells. Cells were treated with 4000 units of catalase for 2 hours following incubation with the 5nM bortezomib or 0.5 $\mu$ M PCI-24781 or combination bortezomib/PCI for 48 hours. The percentage of apoptotic cells was determined by annexinV/PI staining followed by flow cytometric analysis. \*P<0.05 for bort/PCI plus catalase as compared to bort/PCI.

**Figure: S2**

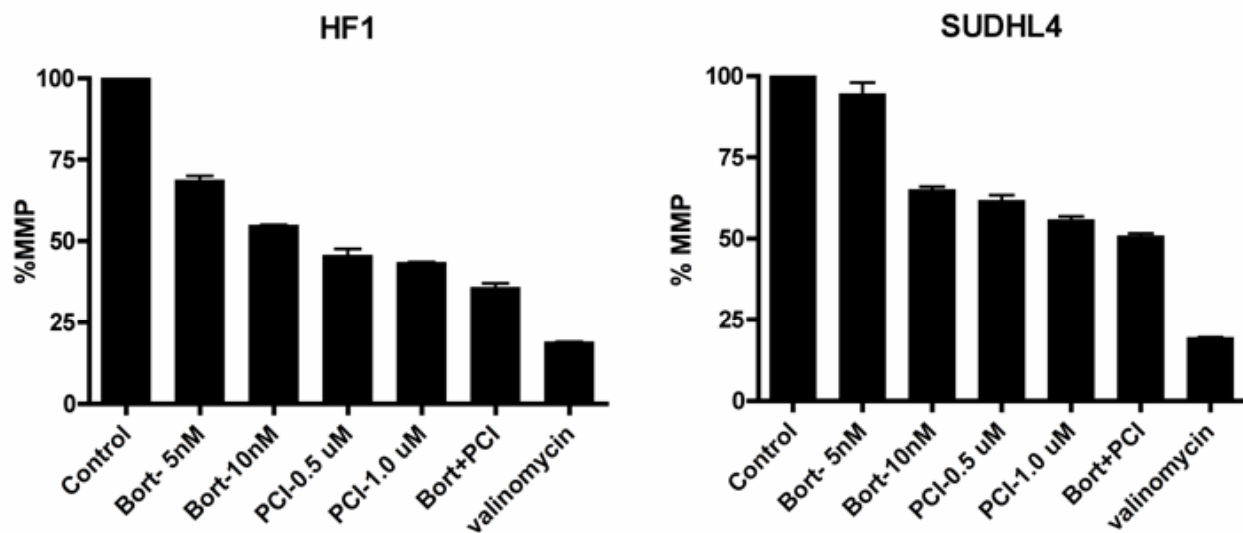

**Fig. S2:** HF1 and SUDHL4 cells were treated with indicated concentrations of bortezomib and PCI-24781 or combination (5nM bortezomib and 0.5 $\mu$ M PCI) for 24 hours. The percentage of cells exhibiting loss of mitochondrial membrane potential ( $\Delta\Psi_m$ ) was determined by JC-1 staining followed by flow cytometric analysis.  $P < 0.01$  for PCI/bortezomib combinations as compared to control or 5nM bortezomib in HF1 as well as in SUDHL4 cells

**Figure: S3**

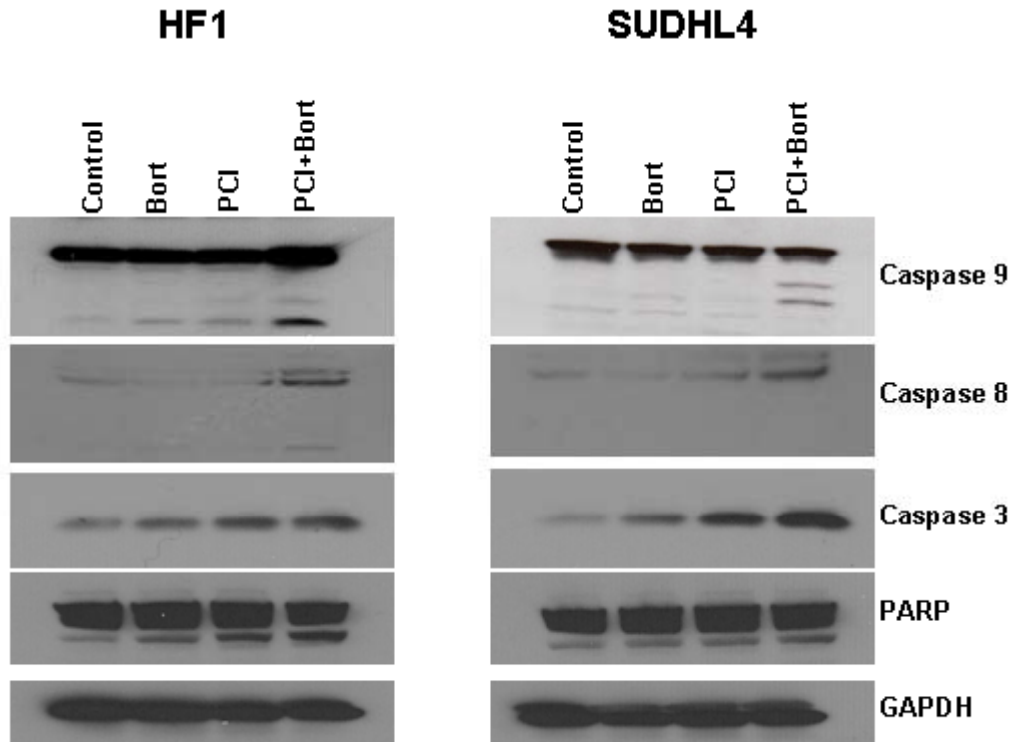

**Fig.S3:** Western blot analysis of caspases 3, 9, 8, and PARP activation in HF1 and SUDHL4 cells. Cells were treated with the 5nM bortezomib or 0.5 $\mu$ M PCI-24781 or combination bortezomib/PCI for 24 hours. GAPDH was used as internal control for all Western blots. PCI, PCI-24781; Bort, bortezomib

**Figure: S4**

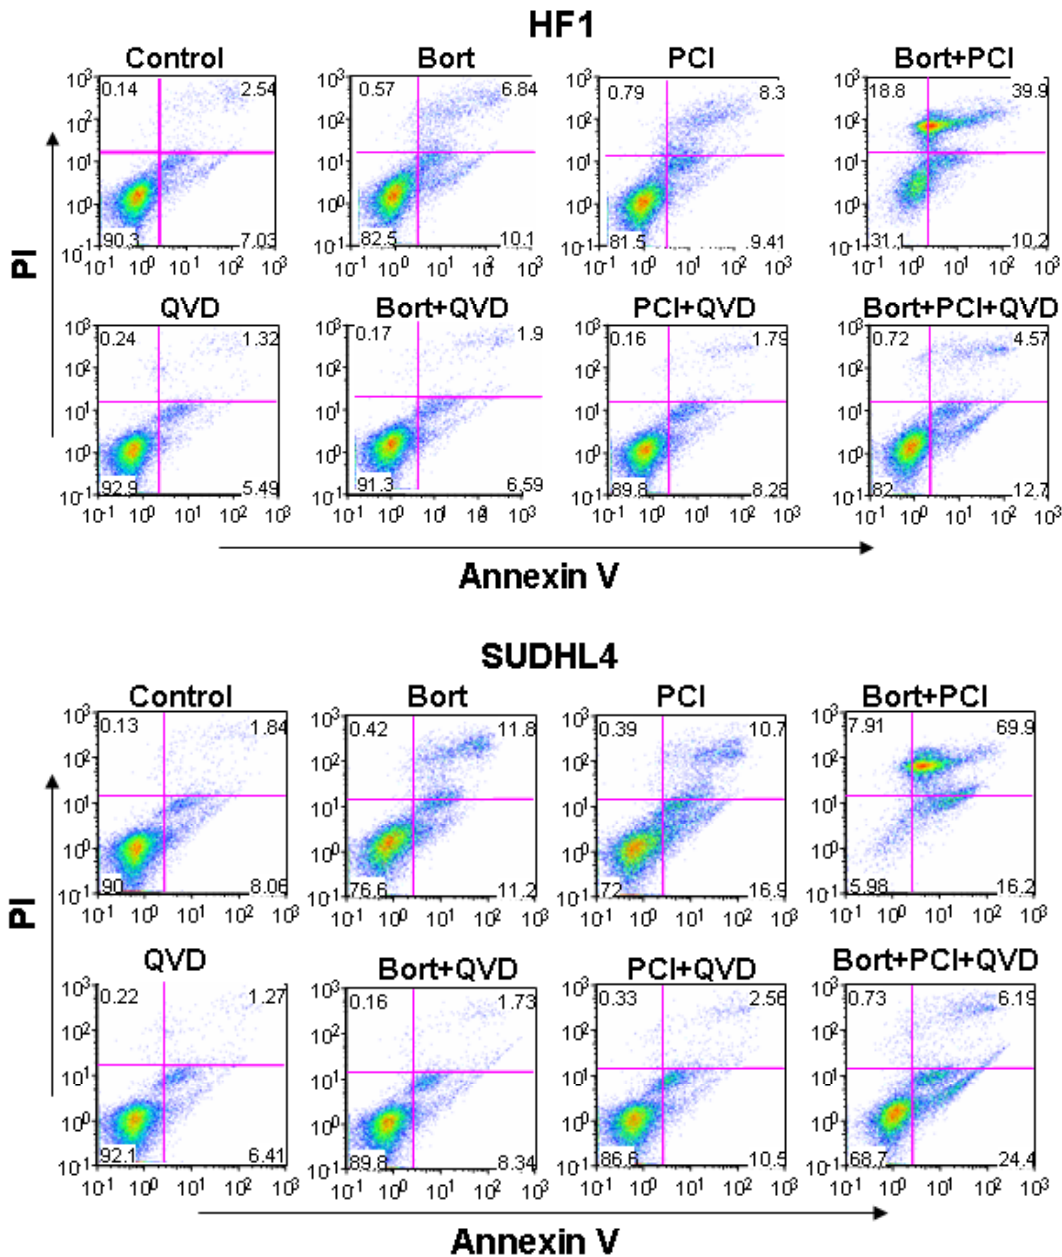

**Fig. S4:** The pan-caspase inhibitor, Q-VD-OPh, inhibited bortezomib/PCI-24781-induced apoptosis in HF1 and SUDHL4 cells. Cells were treated with either 5nM bortezomib or 0.5 $\mu$ M PCI or combined bortezomib/PCI-24781 (5nM bortezomib and 0.5 $\mu$ M PCI-2478i) for 48 hours alone (control) or with 4-hour pretreatment with 50 $\mu$ M Q-VD-OPh. Apoptotic cells were detected by annexinV/propidium iodide staining and measured by flow cytometry. P<0.05

**Figure: S5**

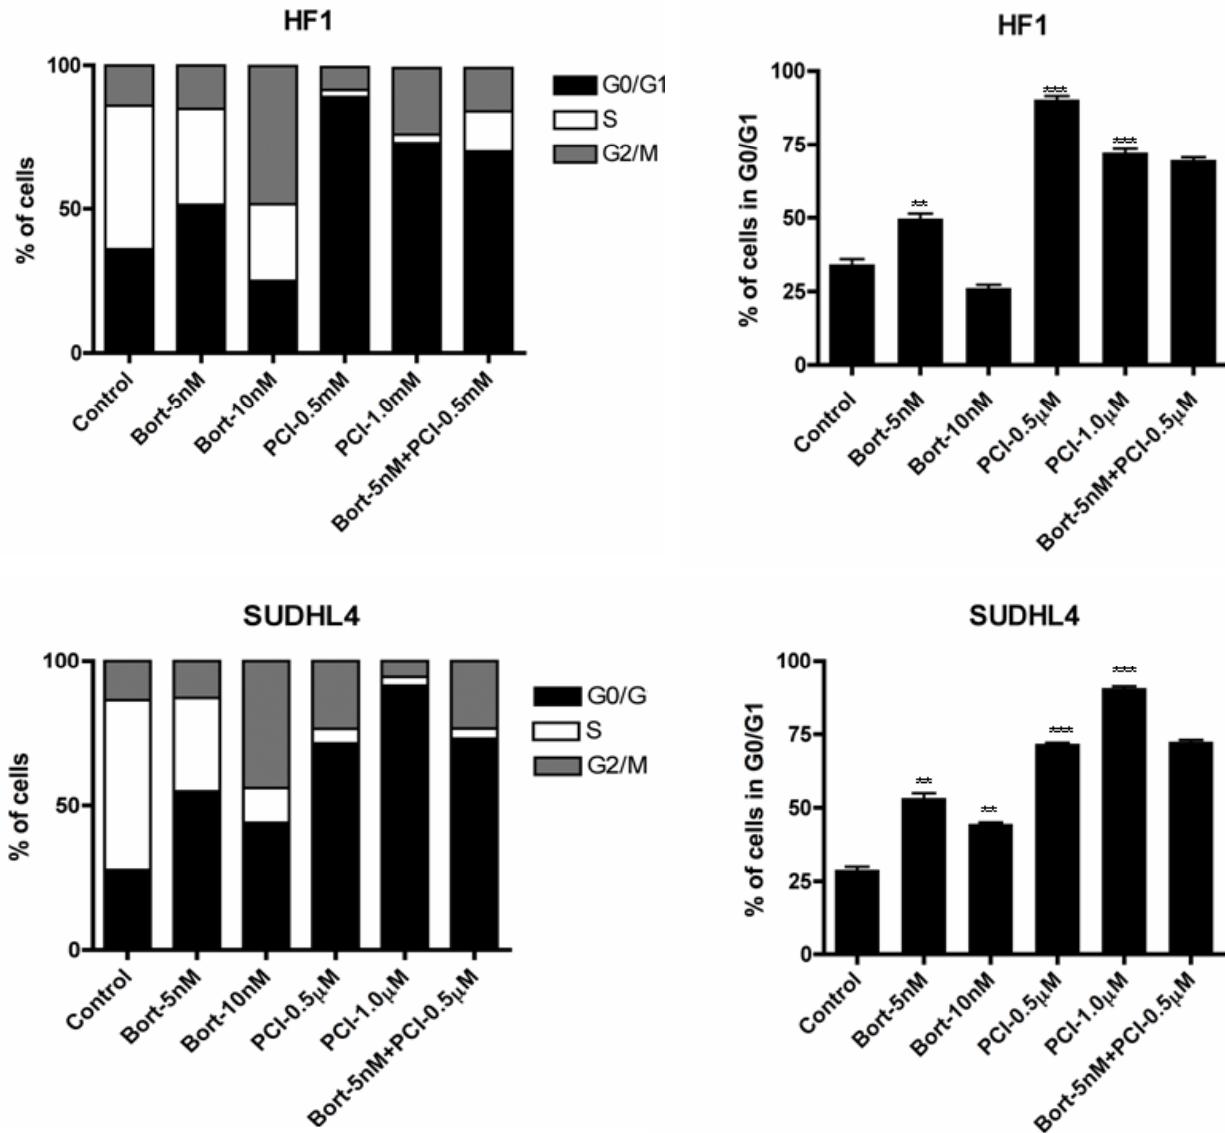

**Fig.S5:** HF1 and SUDHL4 cells were treated with the indicated concentrations of bortezomib or PCI-24781 and the combination for 24 hours and then stained with propidium iodide and their cell cycle profiles were examined by flow cytometry. \*\*P<0.01, and \*\*\*P<0.001. P values for single-agents reflect bortezomib or PCI-24781 vs control; Combination bortezomib/PCI-24781 not significant vs matching single-agent concentrations.

**Figure: S6**

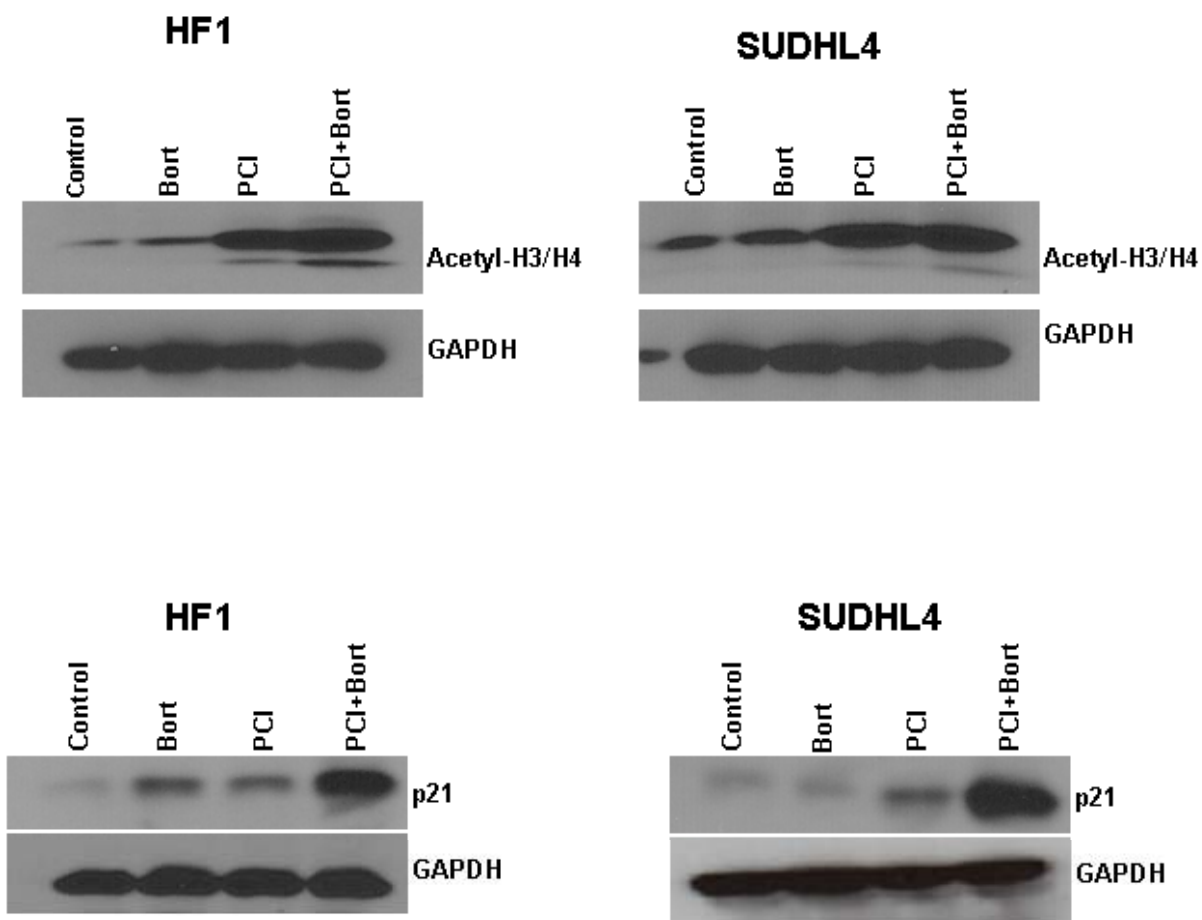

**Fig.S6:** Western blot showing histone hyperacetylation and P21 upregulation in HF1 and SUDHL4 cells. Cells were treated with 5nM of bortezomib and 0.5 $\mu$ M of PCI-24781 or the combination bort/PCI for 16 hours. The level of acetyl histone H3/H4 and p21 protein was measured using antibody as described in the Methods. GAPDH was used as internal control for all Western blots. PCI, PCI-24781; Bort, bortezomib.

**Figure: S7**

L428

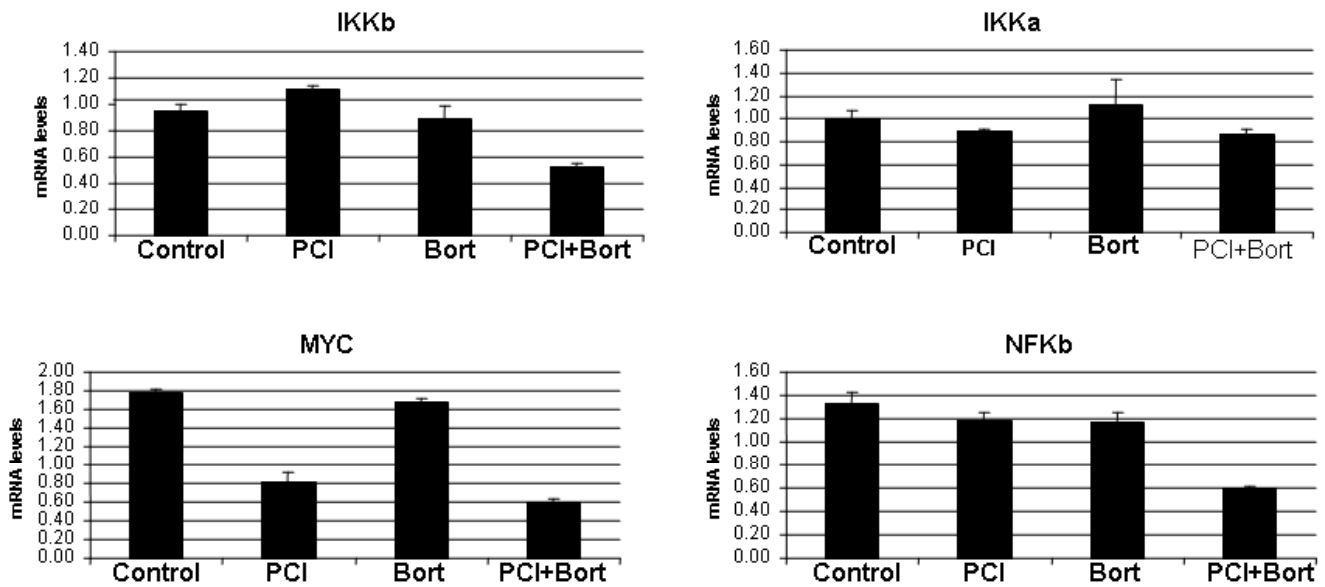

P<0.01 for the combination PCI/Bort as compared to control as well as single agent bortezomib and PCI for NFKb and IKKb and MYC. P<0.05 for combination as compared to control and bortezomib for IKKa.

**Fig.S7:** NF- $\kappa$ B1 (p105), c-Myc, IKK $\alpha$ , and IKK $\beta$  mRNAs were quantified by RT-PCR. L428 cells were treated with 10 nM bortezomib or 1 $\mu$ M PCI-24781 or the combination for 24 hours.

**Figure: S8**

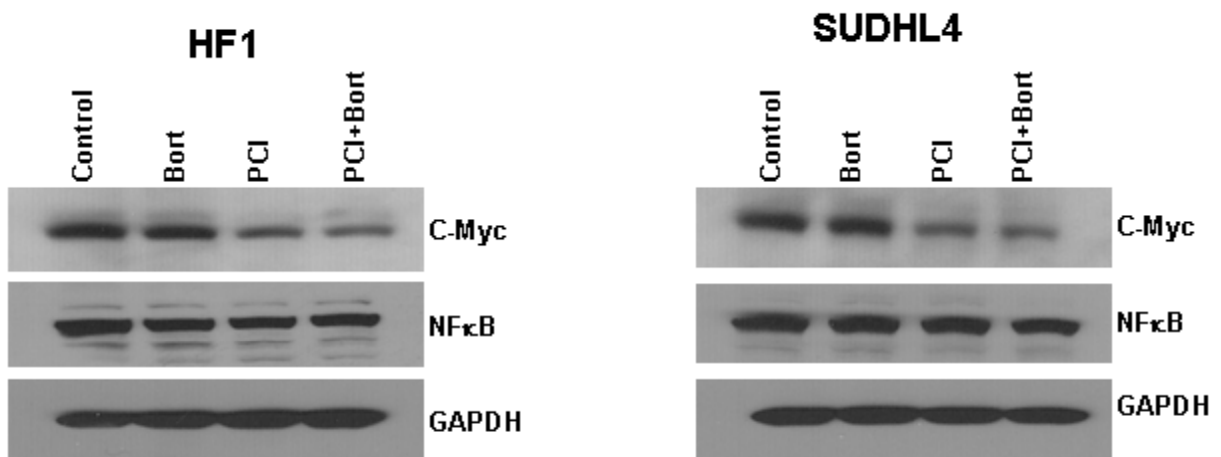

**Fig.S8:** Western blot of c-Myc and NF- $\kappa$ B p65 (RelA) protein expression. HF1 and SUDHL4 cells were treated with 5nM of bortezomib and 0.5 $\mu$ M of PCI-24781 or the combination bort/PCI for 16 hours. The level of c-Myc and NF- $\kappa$ B protein was measured using antibody as described in the Methods. GAPDH was used as internal control for all Western blots. PCI, PCI-24781; Bort, bortezomib.
